# Supplementary material for: Targeting the Annexin A1-FPR2/ALX pathway for host-directed therapy in dengue disease
Source: eLife journal article supplement (doi:10.7554/elife.73853), 2022-03-16

**A)****Mock****DENV-2****DENV-2 + Ac<sub>2-26</sub> i.pl.****DENV-2 + Ac<sub>2-26</sub> i.p.**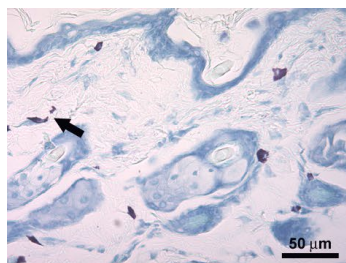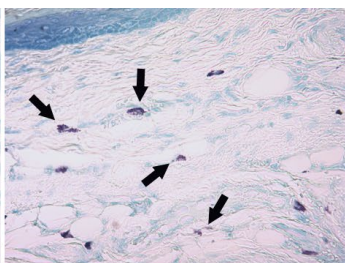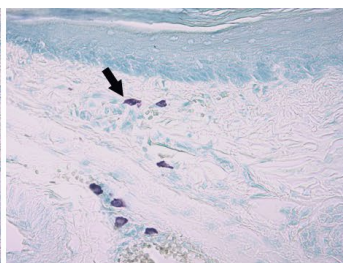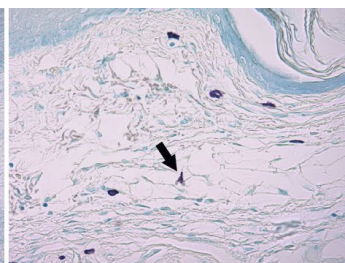**B)****BALB/c WT****AnxA1 KO****Mock**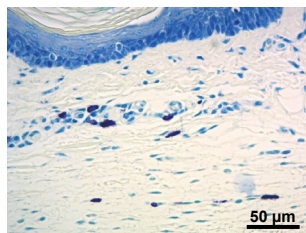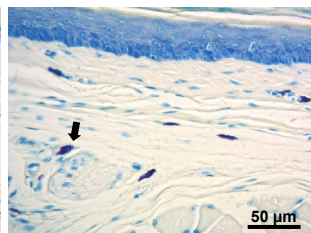**Mock + Ac<sub>2-26</sub>**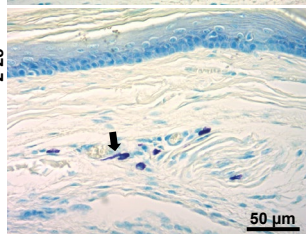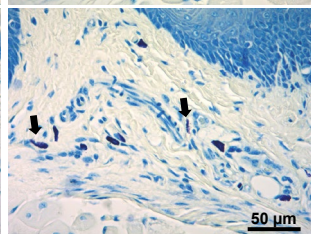**DENV-2**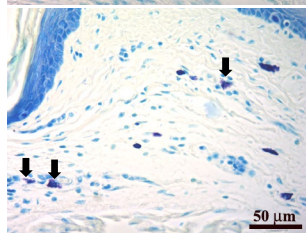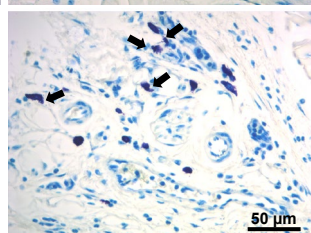**DENV-2 + Ac<sub>2-26</sub>**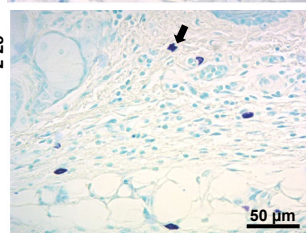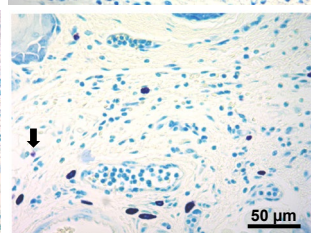**C)****C57BL/6 WT****FPR2 KO****Mock**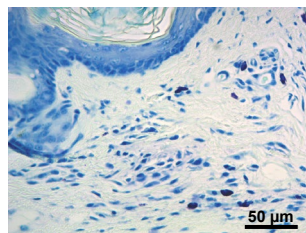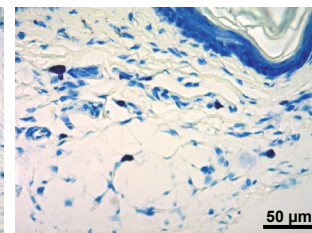**Mock + Ac<sub>2-26</sub>**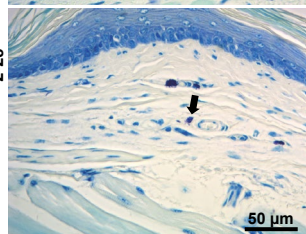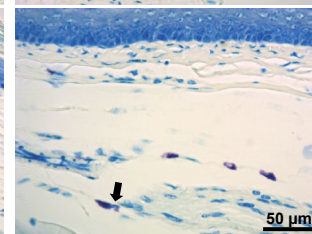**DENV-2**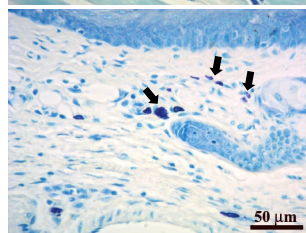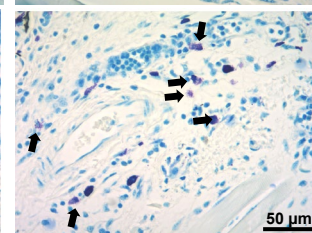**DENV-2 + Ac<sub>2-26</sub>**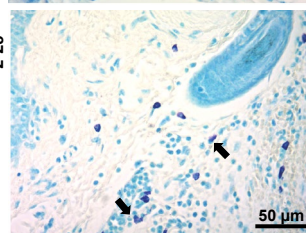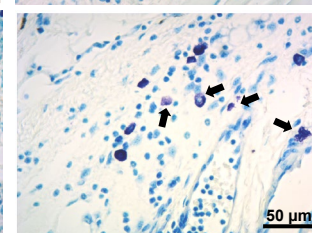

Supplement: supp [file elife-73853-supp-v1.zip]
