# Supplementary material for: Targeting the Annexin A1-FPR2/ALX pathway for host-directed therapy in dengue disease
Source: eLife. 2022 Mar 16;11:e73853. doi: 10.7554/eLife.73853 (PMC8959599; doi:10.7554/eLife.73853)
Supplement: Figure 1—source data 1. [file elife-73853-fig1-data1.xlsx]

## Sheet: Fig 1A
Annexin A1 (ng/mL of plasma)
Fig 1A (i)			Fig 1A (ii)
Healthy	Dengue		non-SD	SD
40.945	16.75		16.75	5.84
64.51	5.465		5.465	26.52
80.79	21.63		21.63	0.75
53.325	22.015		22.015	6.11
26.95	9.67		9.67	1.97
63.68	27.1		27.1	16.605
35.835	26.935		26.935	23.51
38.56	14.285		14.285	7.055
33.8825	17.32		17.32	6.025
26.5995	5.74		5.74	10.565
33.1675	16.875		16.875	22.953
34.24	22.5955		22.5955	14.5975
34.1685	23.668		23.668	16.5995
34.383	24.4545		24.4545	26.109
28.4545	24.097		24.097	24.0255
27.6005	25.384		25.384	23.954
80.582	24.097		24.097	23.4535
28.955	21.96		21.96	22.7385
31.8805	27.815		27.815	16.595
32.8815	26.385		26.385	15.817
33.0245	24.3115		24.3115	17.386
28.1695	27.7435		27.7435	21.8805
28.4545	20.532		20.532	24.1685
26.814	26.0275		26.0275	23.5965
27.1715	27.0285		27.0285	22.238
34.812	22.248		22.248	23.525
33.8825	25.67		25.67	21.1735
32.667	25.1695		25.1695	23.239
27.7435	23.3105		23.3105	20.5935
33.811	23.811		23.811
28.53	28.101		28.101
30.818	5.84
29.817	26.52
27.529	0.75
26.1705	6.11
23.096	1.97
25.4555	16.605
25.813	23.51
27.1	7.055
30.675	6.025
30.0315	10.565
	22.953
	14.5975
	16.5995
	26.109
	24.0255
	23.954
	23.4535
	22.7385
	16.595
	15.817
	17.386
	21.8805
	24.1685
	23.5965
	22.238
	23.525
	21.1735
	23.239
	20.5935

## Sheet: Fig 1B
Annexin A1 (pg/mL of plasma)
	Hours post-infection
Mock	24	48	72	96
322.12	225.56	208.24	185.16	112
294.33	231.95	227.64	212.61	98
333.12	231.08	165.91	196.82	116
281.49	187.51	243.81	180.5	122
221	233	215.94	117.48	143
275	243	161.14	186.26	101
245	198	164.67	190.91	106
288	212	177.34	138.58	115

## Sheet: Fig 1C
Annexin A1 (pg/mL of plasma)
	Hours post-infection
Mock	24	48	72	96
337.11	216.02	169.88	132.08	102
353.64	187.85	204.32	124.65	96
237.08	137.11	141.28	26.8	88
296.79	153.64	189.93	101.9	97
257.71	177.08	172.74	113.6	82
321.08	196.79	150.5	96
