# Supplementary material for: Targeting the Annexin A1-FPR2/ALX pathway for host-directed therapy in dengue disease
Source: eLife. 2022 Mar 16;11:e73853. doi: 10.7554/eLife.73853 (PMC8959599; doi:10.7554/eLife.73853)
Supplement: Figure 2—source data 1. [file elife-73853-fig2-data1.xlsx]

## Sheet: Fig 2B
Platelets (x10^3/µL of blood)
WT
Mock	1175	1425	1025	1550	1250	1175
24	625	500	575	775	500	825	550	650
48	650	500	500	850	775	550	750	650
72	1275	1175	1375	1475	1350	1250	1200	1100
96	1200	1250	1050	1100	1200	1100	1150	1174
AnxA1 KO
Mock	1125	1225	1275	1250	1100	1150
24	250	450	500	525	275	500
48	450	400	375	400	350	425
72	625	800	525	475	850	800
96	950	1100	1150	1050	1150	1000

## Sheet: Fig 2C
Hematocrit (%)
WT
Mock	40	38	38	37	38	39
24	40	42	42	42	41	42	42	42
48	42	42	42	43	42	41	41	42
72	39	39	38	39	41	38	40	39
96	38	39	40	39	39	38	39	39
AnxA1 KO
Mock	38	38	38	39	39	38
24	43	46	44	42	43	46
48	45	44	44	45	46	44
72	42	44	42	44	46	43
96	40	40	39	40	41	40

## Sheet: Fig 2D
Evans blue (μg per 100 mg of liver)
WT
Mock	1.554	1.9525	1.838	1.56	1.62
24	2.323	2.566	2.6325	2.879	2.262
48	2.923	2.966	2.225	2.879	3.262
72	1.98	1.93	2.04	1.76	1.88
96	2.02	1.93	1.88	1.923	2.12
AnxA1 KO
Mock	1.753	1.444	1.5705	1.44	1.58
24	3.423	3.201	3.261	3.298	3.583
48	3.823	3.901	3.961	3.898	3.783
72	2.98	3.05	2.87	2.89	2.96
96	2.22	2.13	2.32	1.98	2.41

## Sheet: Fig 2E
MCPT1 (ng/mL of plasma)
WT
Mock	0	0	0	0	0
24	36	28	33	41	42
48	22	18	25	24.5	18
72	0	0	0	0	0
96	0	0	0	0	0
AnxA1 KO
Mock	0	0	0	0	0
24	42	56	38	51	40
48	28	25	25	29	31
72	0	0	0	0	0
96	0	0	0	0	0

## Sheet: Fig 2F
CCL2 (pg/mL of plasma)
WT
Mock	36	36	54	63	32
24	265.173	470.202	439.38	297.465	299.12
48	837.68	416.192	650.163	836.418	944
72	116.154	329.475	270	248.919	213
96	71	44	83	56	43
AnxA1 KO
Mock	33	21	45	32	35
24	500.778	892.086	629.475	1375.02	987
48	1121	998	1543	1357	1412
72	654	885	446	923	976
96	112	134	123	143	155.4

## Sheet: Fig 2G
Platelets (x10^3/µl of blood)
WT
Mock	1150	1200	1200	1300	1200
24	550	600	550	550	575
48	550	550	450	400	550
72	1000	950	1050	1100	1000
96	1050	1200	1000	1000	1150
FPR2 KO
Mock	1000	1175	1000	1050	1150
24	250	400	350	350	350
48	300	325	400	350	325
72	650	675	725	675	750
96	1000	950	1050	950	975

## Sheet: Fig 2H
Hematocrit (%)
WT
Mock	38	38	39	39	38
24	41	42	41	40	41
48	42	41	42	42	43
72	39	39	38	40	38
96	39	39	39	38	38
FPR2 KO
Mock	38	37	38	39	40
24	43	44	44	43	44
48	45	46	45	46	46
72	42	43	43	43	42
96	39	40	41	40	39

## Sheet: Fig 2I
Evans blue (μg per 100 mg of liver)
WT
Mock	1.268	1.243	1.1645	1.3615	1.21
24	1.673	1.5695	1.5855	1.8235	1.89
48	1.962	2.1235	2.3355	2.502	1.986
72	1.55	1.574	1.6	1.376	1.33
96	1.322	1.433	1.234	1.221	1.211
FPR2 KO
Mock	1.338	1.2105	1.21	1.2685	1.28
24	2.037	2.328	1.8905	1.9995	2.23
48	2.4465	2.6405	2.781	2.757	2.77
72	1.867	1.92	1.94	1.896	1.91
96	1.456	1.552	1.51	1.498	1.321

## Sheet: Fig 2J
MCPT1 (ng/mL of plasma)
WT
Mock	0	0	0	0	0
24	38	42	36.9	38.8	41
48	21	22	18.9	23	23
72	0	0	0	0	0
96	0	0	0	0	0
FPR2 KO
Mock	0	0	0	0	0
24	44	46	51	49	55
48	25	26	28	28.8	34
72	0	0	0	0	0
96	0	0	0	0	0

## Sheet: Fig 2K
CCL2 (pg/mL of plasma)
WT
Mock	26	44	54	45	25
24	321	371	377	365	376
48	444	654	553	512	510
72	112	133	127	116	115
96	32	44	34	65	62
FPR2 KO
Mock	28	44	45	49	28
24	442	412	456	501	555
48	858	921	744	756	811
72	221	212	334	254	266
96	55	67	43	45	44
