# Supplementary material for: Targeting the Annexin A1-FPR2/ALX pathway for host-directed therapy in dengue disease
Source: eLife. 2022 Mar 16;11:e73853. doi: 10.7554/eLife.73853 (PMC8959599; doi:10.7554/eLife.73853)
Supplement: Figure 3—source data 1. [file elife-73853-fig3-data1.xlsx]

## Sheet: Fig 3B
Platelets (x10^3/μl blood)
Vehicle
Mock	1175	1225	1025	1100	1150
24	400	475	375	475	375
48	450	475	500	450	525
72	1000	950	1050	1200	1150
96	1050	1050	1000	1075	1150
Ac2-26
Mock	975	1200	1000	1100	1025
24	750	775	800	925	925
48	900	875	850	875	950
72	1100	1150	1050	1150	1100
96	1150	1100	1050	1100	1175

## Sheet: Fig 3C
Hematocrit (%)
Vehicle
Mock	38	39	38	39	39
24	42	42	41	41	42
48	42	44	43	43	42
72	38	38	39	38	39
96	40	39	39	40	40
Ac2-26
Mock	38	40	37	38	39
24	39	40	39	38	38
48	39	40	40	40	41
72	40	39	39	38	40
96	40	40	39	40

## Sheet: Fig 3D
Evans blue (μg per 100 mg of liver)
Vehicle
Mock	1.81	1.97	1.78	1.876	1.75
24	2.567	2.446	2.876	2.786	2.88
48	3.1	2.97	3.23	2.998	3.112
72	1.88	1.98	2.012	2.1	1.897
96	1.88	1.976	2.01	1.96	1.86
Ac2-26
Mock	1.88	1.92	2.1	1.8	1.85
24	1.987	2.21	2.13	2.12	1.96
48	2.23	2.43	2.34	2.51	2.35
72	1.998	2.054	2.21	2.023	2.056
96	1.844	1.945	2.05	1.79	1.69

## Sheet: Fig 3E
MCPT1 (ng/mL of plasma)
Vehicle
Mock	0	0	0	0	0
24	36	28	33	41	44
48	22	18	25	24.5	25
72	0	0	0	0	0
96	0	0	0	0	0
Ac2-26
Mock	0	0	0	0	0
24	12	15	15	16	17
48	12	8	0	10	11
72	0	0	0	0	0
96	0	0	0	0	0

## Sheet: Fig 3F
CCL2 (pg/mL of plasma)
Vehicle
Mock	36	45	22	67	44
24	165.173	221	354	276	297
48	676	444	687	655	644
72	89	111	98	132	122
96	77	54	89	78	55
Ac2-26
Mock	22	18	0	0	23
24	76	89	102	112	121
48	226	312	276	288	212
72	43	65	45	34	31
96	44	52	34	56	43

## Sheet: Fig 3G
Platelets (x10^3/μl blood)
Vehicle
Mock	1100	1050	1150	1025	1150
24	550	525	475	500	525
48	450	400	500	500	575
72	950	1050	1050	1000	1000
96	1100	1100	1025	1000	1000
Ac2-26
Mock	1000	1150	1175	975	1150
24	550	600	575	600	475
48	575	600	500	500	525
72	1050	1100	1100	950	1025
96	1000	1000	1025	1125	1125

## Sheet: Fig 3H
Hematocrit (%)
Vehicle
Mock	38	39	40	40	39
24	43	42	42	43	42
48	43	44	43	42	44
72	40	41	41	40	39
96	39	39	40	40	39
Ac2-26
Mock	37	38	39	37	38
24	42	43	43	42	43
48	45	43	42	42	42
72	39	39	41	40	40
96	40	40	39	40	39

## Sheet: Fig 3I
Evans blue (μg per 100 mg of liver)
Vehicle
Mock	1.803	2.044	1.6655	1.89	1.678
24	2.55	2.6	2.87	2.67	2.68
48	2.98	3.01	2.98	2.88	2.93
72	1.88	1.56	1.78	1.67	1.68
96	1.54	1.78	1.67	1.88	1.84
Ac2-26
Mock	2.13	2.02	1.86	1.77	2.01
24	2.49	2.72	2.56	2.62	2.65
48	3.05	2.78	2.98	2.76	2.96
72	1.44	1.81	1.56	1.76	1.77
96	1.87	1.94	1.95	1.76	1.82

## Sheet: Fig 3J
MCPT1 (ng/mL of plasma)
Vehicle
Mock	0	0	0	0	0
24	48	51	54	52	55
48	28	29	33	34.4	31
72	0	0	0	0	0
96	0	0	0	0	0
Ac2-26
Mock	0	0	0	0	0
24	44	49	52	51	52
48	25	24	25	29	30
72	0	0	0	0	0
96	0	0	0	0	0

## Sheet: Fig 3K
CCL2 (pg/mL of plasma)
Vehicle
Mock	26	44	54	45	28
24	421	451	478	487	476
48	543	645	498	622	617
72	112	143	143	102	96
96	33	43	24	54	44
Ac2-26
Mock	15	0	21	18	0
24	412	512	443	323	444
48	623	576	412	578	599
72	88	112	123	98	102
96	25	44	46	57	39
