# Supplementary material for: Targeting the Annexin A1-FPR2/ALX pathway for host-directed therapy in dengue disease
Source: eLife. 2022 Mar 16;11:e73853. doi: 10.7554/eLife.73853 (PMC8959599; doi:10.7554/eLife.73853)
Supplement: Figure 4—source data 1. [file elife-73853-fig4-data1.xlsx]

## Sheet: Fig 4B
Annexin A1 (pg/mL of plasma)
Hours post-infection
0	72	120
192	112	86
188	98	57
156	115	72
202	96	44
177	103	91

## Sheet: Fig 4C
Body weight loss (%)
Mock (Vehicle)
0	0	100	100	100	100
24	24	101.75	100.42	100.86	100.17
48	48	102.42	100.55	102.38	101.57
72	72	102.49	99.96	102.05	101.57
96	96	102.63	101.95	103.19	103.99
120	120	103.16	102.59	103.58	103.43
Mock (Ac2-26)
0	100	100	100	100
24	101.75	100.42	100.86	100.17
48	102.42	100.55	102.38	101.57
72	102.49	100	102.05	101.57
96	102.63	101.95	103.19	103.99
120	104	102.59	103.58	103.43
DENV-2 (Vehicle)
0	100	100	100	100	100	100	100	100
24	101.37	101.08	104.81	105.18	100.73	99.49	102.69	106.48
48	97.26	96.86	95.81	97.72	97.85	93.08	97.1	102.15
72	94.2	94.4	93.68	90.92	90.73	97.49
96	91.76	91.29	92.79	90.84	88.15	96.89
120	87.4	89	90.31	88.5	86	89.13
DENV-2 (Ac2-26)
0	100	100	100	100	100	100
24	101.58	101.61	101.61	100.6	102.85	100.2
48	101.5	102.13	98.52	100.46	95.55	95.29
72	101	102	100.69	100.96	95.4	97.72
96	101	101	100.15	98.81	93.35	92.4
120	93	96	95.8	92.32	89.47	86.22

## Sheet: Fig 4D
Platelets (x 10^3/μL of blood)
Mock		DENV-2
Vehicle	Ac2-26	Vehicle	Ac2-26
1137.5	950	637.5	850
1037.5	925	550	762.5
1012.5	1100	425	812.5
1050	1175	512.5	700
1125	1200	587.5	825
975		612.5	975
1100		525	800
925		625	700
		575	800
		300	675
		475	775
		625
		625
		225

## Sheet: Fig 4E
Hematocrit (%)
Mock		DENV-2
Vehicle	Ac2-26	Vehicle	Ac2-26
35	35	42	39
37	36	43	39
37	36	42	40
38	38	42	40
40	38	44	38
38	39	41	41
36	38	43	39
39	36	41	39

## Sheet: Fig 4F
CCL5 (pg/mL of plasma)
Mock		DENV-2
Vehicle	Ac2-26	Vehicle	Ac2-26
0	88.038	200.346	189.638
139.428	141.86	223.186	142.178
142.178	0	284.416	220.326
270.294	0	411.114	209.478
155.84		256.936	58.058
102.024		393.06
		263.156
CCL5 (pg/100mg of spleen)
Mock		DENV-2
Vehicle	Ac2-26	Vehicle	Ac2-26
122	132	600.346	189.638
139.428	141.86	453.186	142.178
142.178	121	684.416	220.326
144	112	611.114	209.478
		656.936	158.058
		593.06	143
		563.156

## Sheet: Fig 4G
IL-6 (pg/mL of plasma)
Mock		DENV-2
Vehicle	Ac2-26	Vehicle	Ac2-26
8.66	0	177.09	78.952
8.802	0	146.726	172.262
9.09	8	147.422	210.152
22	12	240.726	65.056
0		200.186	35.658
0		164.276	85.168
0		330.104	168.77
		115.77	163.722
		147.794	239.928
		164.862	114.458
		436.714	461.544
		144.386	261.256
		123.986	145.846
IL-6 (pg/100mg of spleen)
Mock		DENV-2
Vehicle	Ac2-26	Vehicle	Ac2-26
0	0	312	112
0	0	344	212
12	0	298	89
18	15	412	111
		376	104
		332	98
		326
		245

## Sheet: Fig 4H
MCPT1 (ng/mL of plasma)
Mock		DENV-2
Vehicle	Ac2-26	Vehicle	Ac2-26
0	0	25.3	18.2
0	0	36.52	16.3
0	0	33.23	12.44
0	0	38	14.3
0	0	26.8	15.42

## Sheet: Fig 4I
CCL2 (pg/mL of plasma)
Mock		DENV-2
Vehicle	Ac2-26	Vehicle	Ac2-26
122	144	822	776
196.2	178.2	1113	956.3
183.3	222.01	1028.2	1022
155	188.2	921.35	882.33
206.11	213.5	1004.33	835.64

## Sheet: Fig 4J
Histopatological score liver
Total=12
Mock (Vehicle)	DENV-2
	Vehicle	Ac2-26
0	6	2
0	6	4
0	5	3
0	8	4
	8	2
	5	2
	7
	5

## Sheet: Fig 4L
ALT (U/L)
Mock		DENV-2
Vehicle	Ac2-26	Vehicle	Ac2-26
30	22	145	89
44	29	165	96
36	42	155	102
25	34	176	88
		122	89
		165	92
		175
		188

[truncated: 1 more sheets: Fig 4M]
