# Supplementary material for: Targeting the Annexin A1-FPR2/ALX pathway for host-directed therapy in dengue disease
Source: eLife. 2022 Mar 16;11:e73853. doi: 10.7554/eLife.73853 (PMC8959599; doi:10.7554/eLife.73853)
Supplement: Figure 5—source data 1. [file elife-73853-fig5-data1.xlsx]

## Sheet: Fig 5
Figure 5A
Platelets (x10^3/μL of blood)
	Vehicle					Ac2-26
Mock	1250	1100	1150	1100	1000	1100	1150	1125	1200	1050
DENV-1	550	625	575	500	675	950	875	900	950	975
DENV-3	650	600	500	550	625	900	975	975	925	950
DENV-4	650	700	750	675	675	1000	1050	1025	975	975
Figure 5B
Hematocrit (%)
	Vehicle					Ac2-26
Mock	36	37	36	38	39	38	37	40	37	38
DENV-1	43	41	41	42	41	36	38	38	39	39
DENV-3	42	41	41	42	42	38	38	37	38	40
DENV-4	41	41	42	40	41	39	38	38	39	37
Figure 5C
ALT (U/L)
	Vehicle					Ac2-26
Mock	36	38	42	44	45	29	36	45	42	41
DENV-1	122	165	175	188	155	83	61	64	55	46
DENV-3	98	93	112	106	104	55	42	41	45	37
DENV-4	99	112	103	101	95	66	45	34	61	52
Figure 5D
IL-6 (pg/mL of plasma)
	Vehicle					Ac2-26
Mock	0	0	12	0	0	11	0	0	0	0
DENV-1	44	26	45	32	18	0	0	12	15	0
DENV-3	34	26	25	36	44	0	0	0	15	0
DENV-4	22	11	0	0	16	0	0	0	13	0
Figure 5E
IL-6 (pg/100mg of spleen)
	Vehicle					Ac2-26
Mock	25	33	42	0	43	0	44	43	28	34
DENV-1	112	88	78	93	132	66	56	59	55	42
DENV-3	88	76	55	79	80	22	45	34	32	43
DENV-4	77	65	56	68	78	12	0	34	55	43
Figure 5F
Log 10 PFU equivalents per mL of plasma
	Vehicle					Ac2-26
DENV-1	4.4	3.8	2.81954	2.51851	4.69461	2.8	4.4	3.8	2.81954	2.51851
DENV-3	3.84073	3.69461	2.8	4.4	3.8	2.51851	2	2	2.55	2.35
DENV-4	2.8	2.51851	3.8	2.51851	3.8	2	2.55	2.35	2.81954	2.51851
Figure 5G
Log 10 PFU equivalents per 100 mg of spleen
	Vehicle					Ac2-26
DENV-1	3.12057	3.21748	4.56773	2.81954	3.21748	2.81954	2.51851	4.69461	2.8	4.4
DENV-3	2	3.44	5.45	4.48	4.8	3.8	2.51851	3.8	4.4	3.8
DENV-4	3.84073	3.69461	4.48	4.8	2.51851	3.8	2.51851	4.8	4.8	3.69461
