# Supplementary material for: Targeting the Annexin A1-FPR2/ALX pathway for host-directed therapy in dengue disease
Source: eLife. 2022 Mar 16;11:e73853. doi: 10.7554/eLife.73853 (PMC8959599; doi:10.7554/eLife.73853)
Supplement: Figure 6—source data 1. [file elife-73853-fig6-data1.xlsx]

## Sheet: Fig 6A
% Degranulation (in vivo)
Mock	DENV-2
Vehicle	Vehicle	Ac2-26 (i.pl.)	Ac2-26 (i.p.)
34.7826	38.4615	41.1765	26.1538
23.3333	38.1818	50	27.5
23.0769	55.2239	37.5	31.25
12.1212	49.1525	34.6154	25
12	79.1667	30.4348	30.4348
17.6471	64.2857	38.1818	27.2727

## Sheet: Fig 6B
% Degranulation (in vivo)
	WT					AnxA1 KO
Mock	11	8	18	21	10	11	16	23	17	15
Mock + Ac2-26	27	27	9	17	12	8	18	18	12	27
DENV-2	29	50	27	28	23	45	38	35	36	38
DENV-2 + Ac2-26	21	21	16	10	23	28	32	26	30	13

## Sheet: Fig 6C
% Degranulation (in vivo)
	WT					FPR2/ALX KO
Mock	20	25	26	21	18	6	17	33	27
Mock + Ac2-26	13	13	16	36	28	10	0	0	13	20
DENV-2	36	25	28	26	36	41	40	47	41	41
DENV-2 + Ac2-26	16	17	11	23	17	45	43	44	41	41

## Sheet: Fig 6D 
β-hexosaminidase release (%)
BMMC
Mock	DENV-2
Vehicle	Vehicle	Ac2-26 100 µM	Ac2-26 10 µM	Ac2-26 1 µM
23.4	85	50.6	71.2	75.4
23.2	84.3	55.3	68.5	73.4
26.2	74.1	53.5	72.5	72.1
25.3	75.5	59.8	78.6	65.7

## Sheet: Fig 6I
Diameter of secretory granules
BMMC
	Mock	DENV-2
	Vehicle	Vehicle	Ac2-26
Granule 1	556	477	883
Granule 2	765	425	596
Granule 3	461	469	785
Granule 4	566	850	663
Granule 5	556	418	504
Granule 6	545	412	754
Granule 7	713	418	998
Granule 8	593	365	521
Granule 9	415	592	746
Granule 10	461	440	1378
Granule 11	472	470	746
Granule 12	702	916	600
Granule 13	357	403	732
Granule 14	388	440	571
Granule 15	472	513	727
Granule 16	964	499	791
Granule 17	454	410	617
Granule 18	367	520	994
Granule 19	451	865	527
Granule 20	315	432	1419
Granule 21	566	660	1042
Granule 22	515	557	897
Granule 23	367	536	1109
Granule 24	545	576	1043
Granule 25	462	374	1041
Granule 26	357	403	900
Granule 27	493	287	833
Granule 28	672	382	1171
Granule 29	433	869	1029
Granule 30	369	693	1366
Granule 31	630	562	835
Granule 32	781	496	1171
Granule 33	688	880	667
Granule 34	553	572	589
Granule 35	406	649	835
Granule 36	428	879	752
Granule 37	510	374	879
Granule 38	531	374	1206
Granule 39	656	356	932
Granule 40	542	297	743
Granule 41	698	397	593
Granule 42	917	518	2067
Granule 43	333	553	1237
Granule 44	636	563	743
Granule 45	824	1002	943
Granule 46	698	506	1569
Granule 47	953	648	1171
Granule 48	584	705	883
Granule 49	618	682	929
Granule 50	480	626	904
Granule 51	835	342	960
Granule 52	582	396	1383
Granule 53	538	739	532
Granule 54	688	652	304
Granule 55	976	615	390
Granule 56	470	516	597
Granule 57	997	505	415
Granule 58	731	397	412
Granule 59	361	616	514
Granule 60	600	857	250
Granule 61	358	683	1193
Granule 62	438	1418	434
Granule 63	674	813	532
Granule 64	514	1629	1648
Granule 65	862	737	1127
Granule 66	646	1121	607
Granule 67	508	1211	555
Granule 68	430	802	1849
Granule 69	656	649	298
Granule 70	449	495	753
Granule 71	521	758	489
Granule 72	469	485	304
Granule 73	704	561	426
Granule 74	660	639	342
Granule 75	327	1257	457
Granule 76	414	555	1731
Granule 77	332	540	359
Granule 78	571	749	410
Granule 79	581	792	334
Granule 80	404	1129	526
Granule 81	588	953	797
Granule 82	573	777	580
Granule 83	379	896	1257
Granule 84	531	908	566
Granule 85	356	1018	399
Granule 86	317	527	398
Granule 87	370	879	561
Granule 88	613	791	600
Granule 89	501	1132	336
Granule 90	403	778	389
Granule 91	458	1363	576
Granule 92	487	850	640
Granule 93	751	1023	369
Granule 94	792	946	613
Granule 95	501	726	707
Granule 96	320	1012	511
Granule 97	600	539	532
Granule 98	521	1769	783
Granule 99	628	1006	607
Granule 100	522	980	943
Granule 101	444	750	596
Granule 102	424	507	662
Granule 103	799	914	581
Granule 104	668	506	757
Granule 105	319	1419	477
Granule 106	491	1111	488
Granule 107	543	352	772
Granule 108	422	978	581
Granule 109	264	825	434
Granule 110	405	502	546
Granule 111	415	887	586
Granule 112	458	1791	477
Granule 113	396	761	445
Granule 114	479	705	514
Granule 115	500	1187	499
Granule 116	458	1648	705
Granule 117	403	846	607
Granule 118	466	703	618
Granule 119	223	1483	509
Granule 120	833	1278	583
Granule 121	403	1066	579
Granule 122	459	835	600
Granule 123	528	1033	783
Granule 124	257	1012	522
Granule 125	549	948	902
Granule 126	653	970	608
Granule 127	375	835	1062
Granule 128	479	1300	824
Granule 129	472	835	640
Granule 130	806	791	1020
Granule 131	529	1209	685
Granule 132	445	1040	1160
Granule 133	521	784	1052
Granule 134	507	616	623
Granule 135	718	957	759
Granule 136	1099	1154	889
Granule 137	500	813	2374
Granule 138	1392	608	1074
Granule 139	331	607	802
Granule 140	315	1100	1065
Granule 141	777	1181	781
Granule 142	769	909	802
Granule 143	850	902	869
Granule 144	711	953	598
Granule 145	637	902	516
Granule 146	652	1042	1056
Granule 147	669	598	664
Granule 148	704	978	539
Granule 149	574	800	538
Granule 150	411	603	470
Granule 151	410	686	561
Granule 152	653	1070	759
Granule 153	410	852	619
Granule 154	675	934	731
Granule 155	696	749	785
Granule 156	609	724	518
Granule 157	757	858	891
Granule 158	869	675	791
Granule 159	506	708	694
Granule 160	1033	724	632
Granule 161	638	762	1073
Granule 162	696	954	849
Granule 163	835	953	968
Granule 164	1004	902	980
Granule 165	1026	827	693
Granule 166	586	737	879
Granule 167	740	740	1081
Granule 168	594	522	904
Granule 169	535	661	550
Granule 170	382	1042	555
Granule 171	491	534	649
Granule 172	535	1268	637
Granule 173	293	942	462
Granule 174	917	2184	594
Granule 175	484	983	714
Granule 176	1041	1628	747
Granule 177	506	1107	574
Granule 178	345	1546	835
Granule 179	806	1181	791
Granule 180	529	1010	518
Granule 181	498	1220	990
Granule 182	301	1010	541
Granule 183	638	1699	774
Granule 184	410	1366	671
Granule 185	586	1218	517
Granule 186	308	1448	583
Granule 187	447	1185	634
Granule 188	476	1299	628
Granule 189	374	859	583
Granule 190	791	1752	631
Granule 191	638	1562	442
Granule 192	557	2953	528
Granule 193	330	838	386
Granule 194	586	1121	418
Granule 195	799	1393	286
Granule 196	887	1010	374
Granule 197	454	1030	363
Granule 198	726	1162	396
Granule 199	947	504	364
Granule 200	302	1048	253
Granule 201	359	993	455
Granule 202	396	617	418
Granule 203	505	914	462
Granule 204	374	789	451
Granule 205	799	2420	341
Granule 206	601	2364	297
Granule 207	887	804	396
Granule 208	376	993	374
Granule 209	418	1126	473
Granule 210	674	792	572
Granule 211	653	692	682
Granule 212	344	1511	386
Granule 213	777	1109	412
Granule 214	623	1786	209
Granule 215	423	499	441
Granule 216	507	1229	441
Granule 217	1165	631	462
Granule 218	967	801	309
Granule 219	1055	1050	440
Granule 220	826	1448	452
Granule 221	833	991	582
Granule 222	748	1314	363
Granule 223	1473	1086	451
Granule 224	615	952	451
Granule 225	1066	1012	431
Granule 226	1176	804	233
Granule 227	902	859	385
Granule 228	1363	1162	398
Granule 229	726	1115	337
Granule 230	748	705	413
Granule 231	956	819	396
Granule 232	1330	1166	535
Granule 233	1088	1147	410
Granule 234	1055	952	487
Granule 235	1100	1487	396
Granule 236	903	768	440
Granule 237	1769	1010	253
Granule 238	737	781	337
Granule 239	843	1201	454
Granule 240	733	1054	325
Granule 241	599	690	593
Granule 242	1062	991	601
Granule 243	586	1164	411
Granule 244	887	781	527
Granule 245	484	992	718
Granule 246	872	667	381
Granule 247	740	1067	528
Granule 248	586	2195	425
Granule 249	857	1035	455
Granule 250	604	840	396
Granule 251	1033	517	405
Granule 252	565	1109	645
Granule 253	725	1071	323
Granule 254	978	1088	601
Granule 255	733	1799	601
Granule 256	813	579	591
Granule 257	975	1182	494
Granule 258	799	1375	338
Granule 259	1151	688	1308
Granule 260	1121	804	518
Granule 261	638	1124	1520
Granule 262	755	973	791
Granule 263	877	825	649
Granule 264	609	552	494
Granule 265	894	536	864
Granule 266	506	1105	1311
Granule 267	428	1296	791
Granule 268	703	991	718
Granule 269	806	973	1486
Granule 270	945	781	705
Granule 271	997	724	363
Granule 272	820	1067	386
Granule 273	733	938	517
Granule 274	841	991	703
Granule 275	782	954	385
Granule 276	637	935	466
Granule 277	484	993	703
Granule 278	1144	773	571
Granule 279	463	838	777
Granule 280	671	764	1163
Granule 281	714	862	630
Granule 282	1364	1393	425
Granule 283	675	1124	1145
Granule 284	758	572	616
Granule 285	1211	724	1144
Granule 286	994	2847	762
Granule 287	1077	2827	1101
Granule 288	594	839	589
Granule 289	836	736	682
Granule 290	956	514	769
Granule 291	1453	628	618
Granule 292	1424	477	545
Granule 293	1121	516	529
Granule 294	715	781	663
Granule 295	1176	747	982
Granule 296	1375	1494	615
Granule 297	851	897	938
Granule 298	539	1448	558
Granule 299	1791	1644	638
Granule 300	1220	10552	734
Granule 301	1138	628	543
Granule 302	1066	800	324
Granule 303	1956	841	578
Granule 304	1253	573	529
Granule 305	868	629	491
Granule 306	1130	800	359
Granule 307	704	895	720
Granule 308	844	561	498
Granule 309	638	670	513
Granule 310	873	724	602
Granule 311	762	724	278
Granule 312	1070	686	324
Granule 313	807	592	815
Granule 314	711	611	505
Granule 315	755	610	484
Granule 316	886	744	580
Granule 317	727	1014	637
Granule 318	464	667	583
Granule 319	1392	764	670
Granule 320	806	533	671
Granule 321	799	785	473
Granule 322	1004	708	648
Granule 323	601	785	440
Granule 324	549	861	518
Granule 325	1246	934	528
Granule 326	1004	536	892
Granule 327	697	1111	455
Granule 328	1418	1340	457
Granule 329	924	695	594
Granule 330	462	711	656
Granule 331	890	611	396
Granule 332	990	749	692
Granule 333	1000	617	567
Granule 334	649	687	441
Granule 335	638	707	836
Granule 336	857	877	969
Granule 337	879	766	794
Granule 338	1011	978	626
Granule 339	792	919	813
Granule 340	714	725	574
Granule 341	791	513	639
Granule 342	615	1395	243
Granule 343	682	876	462
Granule 344	652	858	615
Granule 345	704	1143	693
Granule 346	484	1067	607
Granule 347	514	1678	571
Granule 348	418	1092	802
Granule 349	674	1401	628
Granule 350	506	1037	352
Granule 351	566	1107	529
Granule 352	550	1295	481
Granule 353	787	1052	517
Granule 354	588	705	561
Granule 355	498	1073	653
Granule 356	425	1619	572
Granule 357	595	1295	618
Granule 358	520	1124	602
Granule 359	586	2253	609
Granule 360	681	949	607
Granule 361	609		1156
Granule 362	491		670
Granule 363	418		850
Granule 364	456		736
Granule 365	543		691
Granule 366	469		750
Granule 367	543		825
Granule 368	638		689
Granule 369	659		646
Granule 370	630		586
Granule 371	726		483
Granule 372	433		897
Granule 373			777
Granule 374			853
Granule 375			1043
Granule 376			939
Granule 377			1421
Granule 378			838
Granule 379			1803
Granule 380			864
Granule 381			747
Granule 382			952
Granule 383			674
Granule 384			675

## Sheet: Fig 6J
Number of fused granules per cell section
BMMC
	Mock	DENV-2
	Vehicle	Vehicle	Ac2-26
Cell section 1	5	12	12
Cell section 2	2	14	4
Cell section 3	4	6	8
Cell section 4	1	10	9
Cell section 5	10	11	14
Cell section 6	0	10	2
Cell section 7	0	20	4
Cell section 8	0	4	0
Cell section 9	0	25	4
Cell section 10	2	11	0
Cell section 11	0	10	0
Cell section 12	4	8	0
Cell section 13	0	0	9
Cell section 14	0	0	2
Cell section 15	0	0	17
