# Supplementary figures and images for: Targeting the Annexin A1-FPR2/ALX pathway for host-directed therapy in dengue disease
Source: eLife journal article supplement (doi:10.7554/elife.73853), 2022-03-16

**A**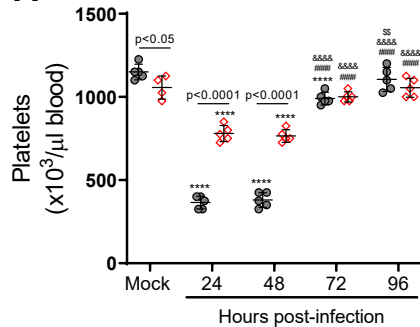**B**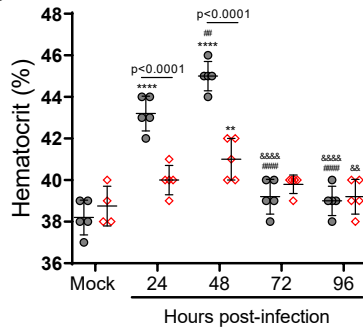**C**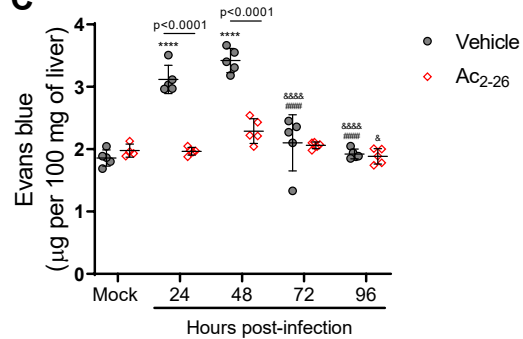**D**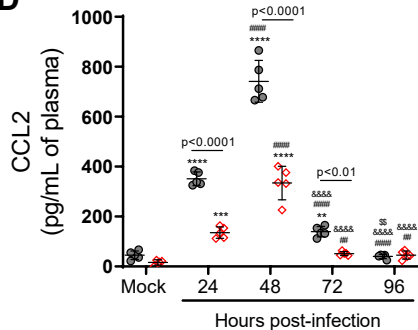**E**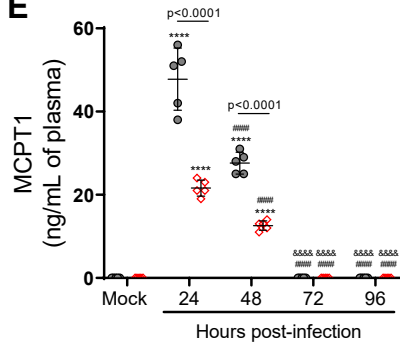

Supplement: supp [file elife-73853-supp-v1.zip]

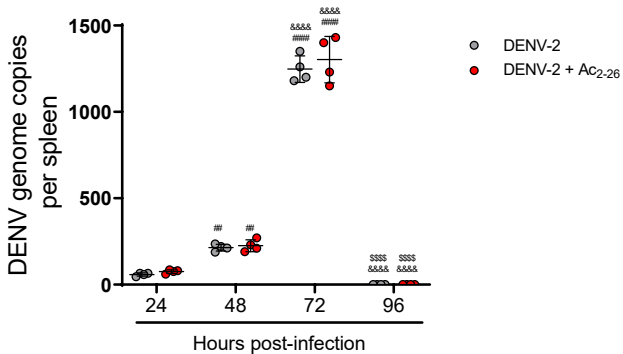

Supplement: supp [file elife-73853-supp-v1.zip]

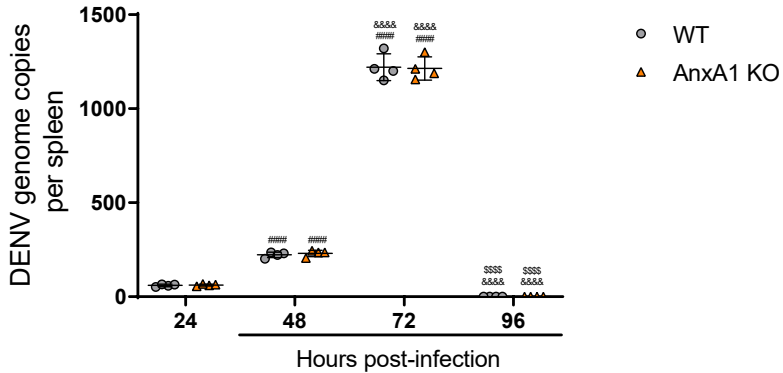

Supplement: supp [file elife-73853-supp-v1.zip]
